# Supplementary material for: Age-dependent electroencephalogram (EEG) patterns during sevoflurane general anesthesia in infants
Source: eLife journal article supplement (doi:10.7554/elife.06513), 2015-06-23
Supplement: supp [file elife_poa_e06513_Figure_4_figure_supplement_1.pdf › elife_poa_e06513_Figure_4_figure_supplement_1.pdf]

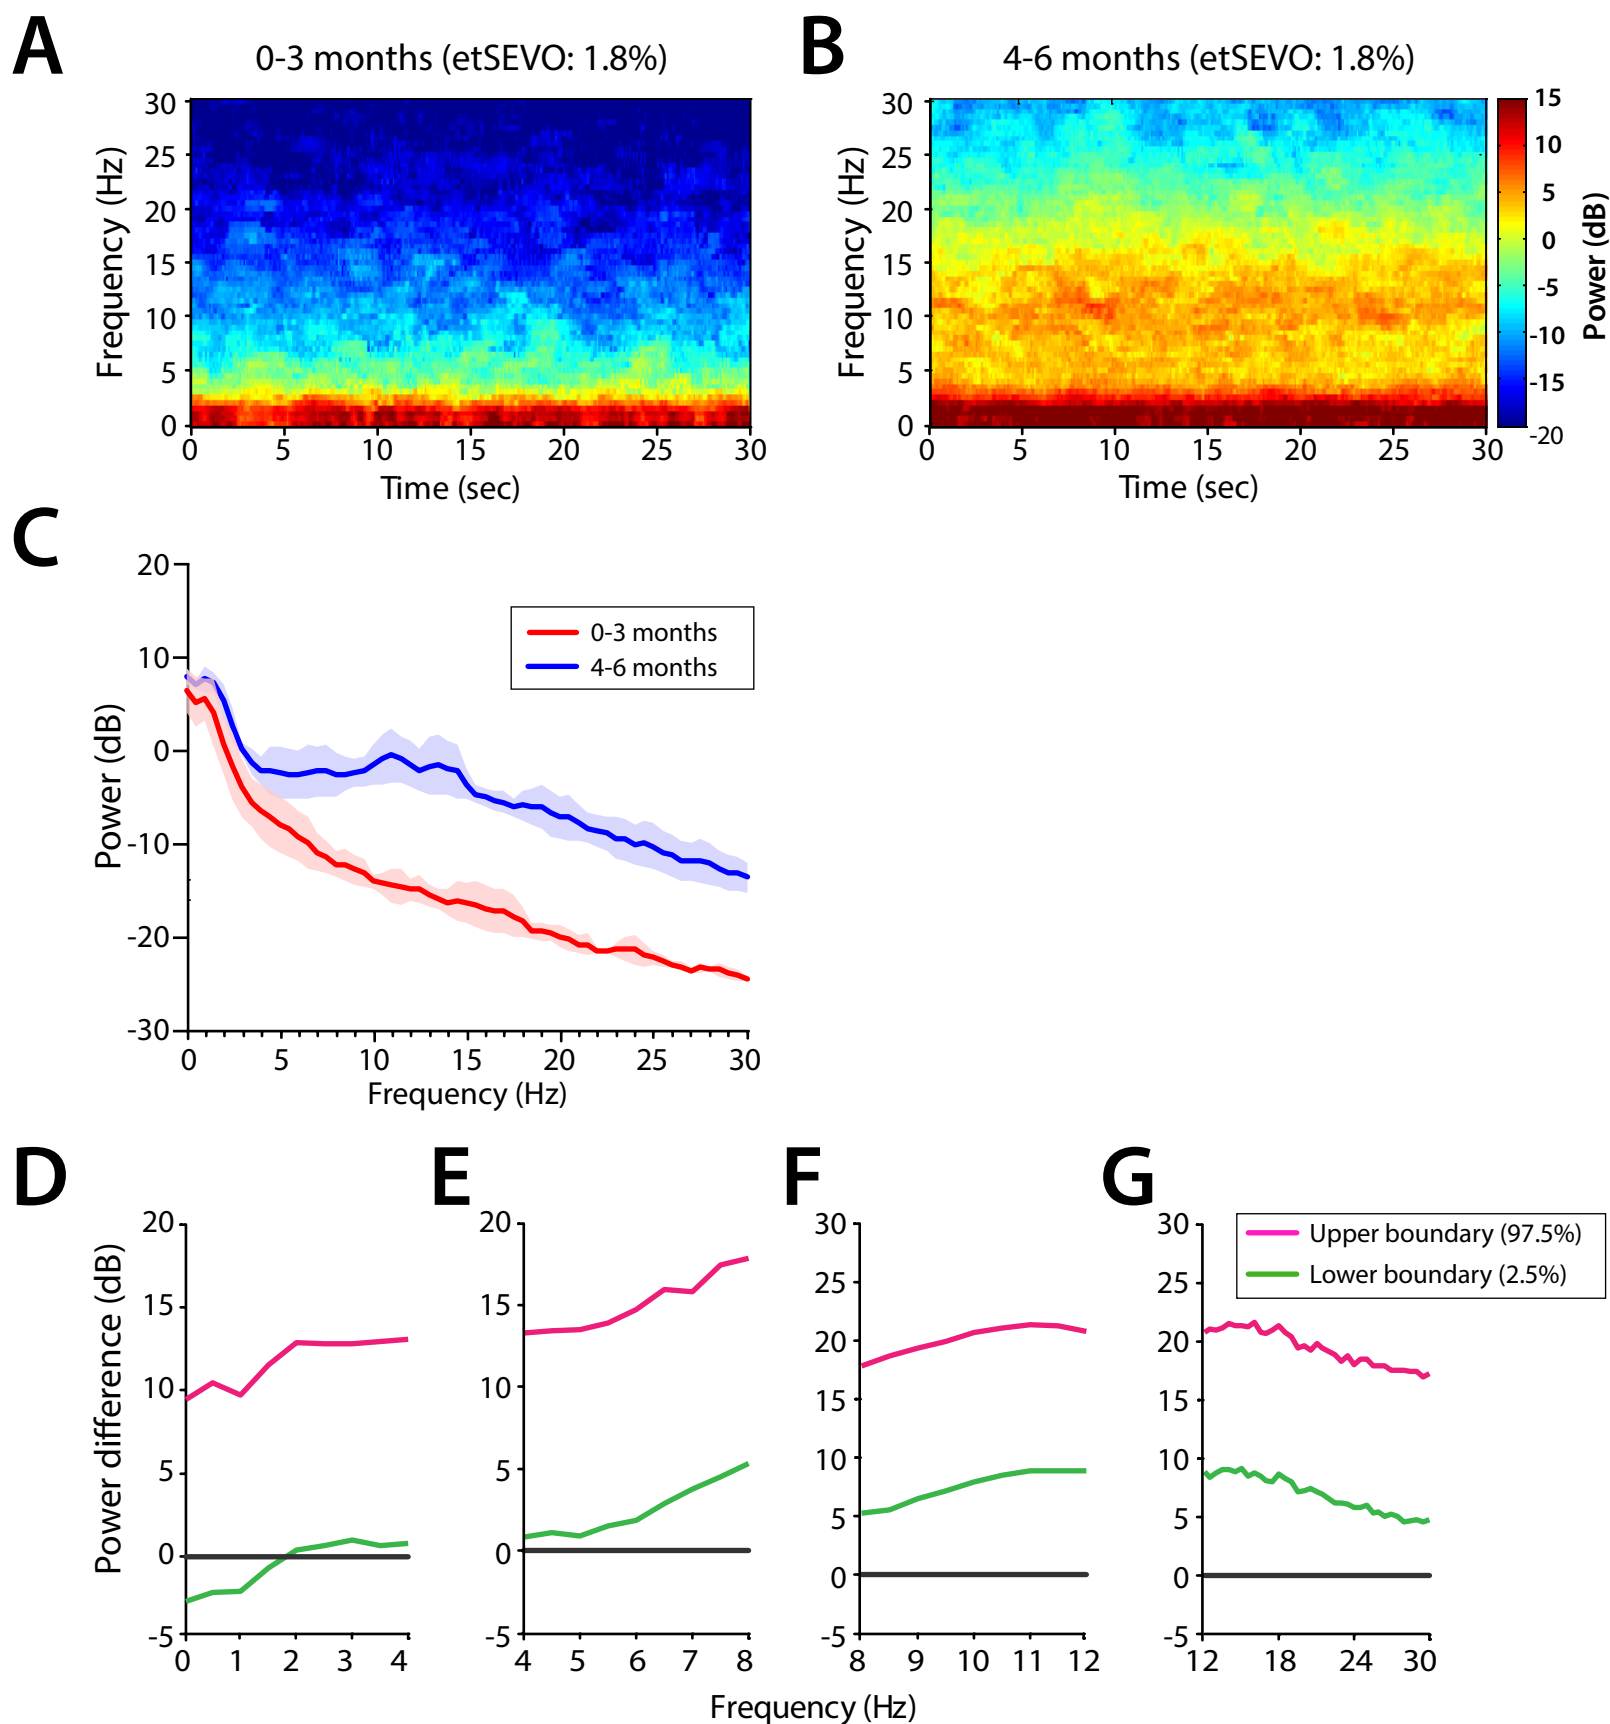

**Figure 4- Figure Supplement 1: Frontal EEG spectral properties in infants anesthetized under a uniform end-tidal sevoflurane concentration (1.8%)**

Group-averaged frontal power spectrograms in infants (**A**) 0 to 3 months of age, and (**B**) 4 to 6 months of age (**C**) Frontal group-medial power spectra (solid line, median; shaded area, 25th – 75th percentile) across 0-30Hz frequencies. (**D-G**) Differences in group-averaged frontal power spectra presented with 95% CI from bootstrap analysis (pink line, 97.5th percentile; green line, 2.5th percentile) comparing infants at 0 to 3 months to infants at 4 to 6 months of age. F7 electrode presented using nearest neighbor Laplacian referencing. etSEVO: end-tidal sevoflurane concentration. Epoch size of 30 seconds is used.
