# Supplementary material for: Age-dependent electroencephalogram (EEG) patterns during sevoflurane general anesthesia in infants
Source: eLife journal article supplement (doi:10.7554/elife.06513), 2015-06-23
Supplement: supp [file elife_poa_e06513_Figure_10_figure_supplement_1.pdf › elife_poa_e06513_Figure_10_figure_supplement_1.pdf]

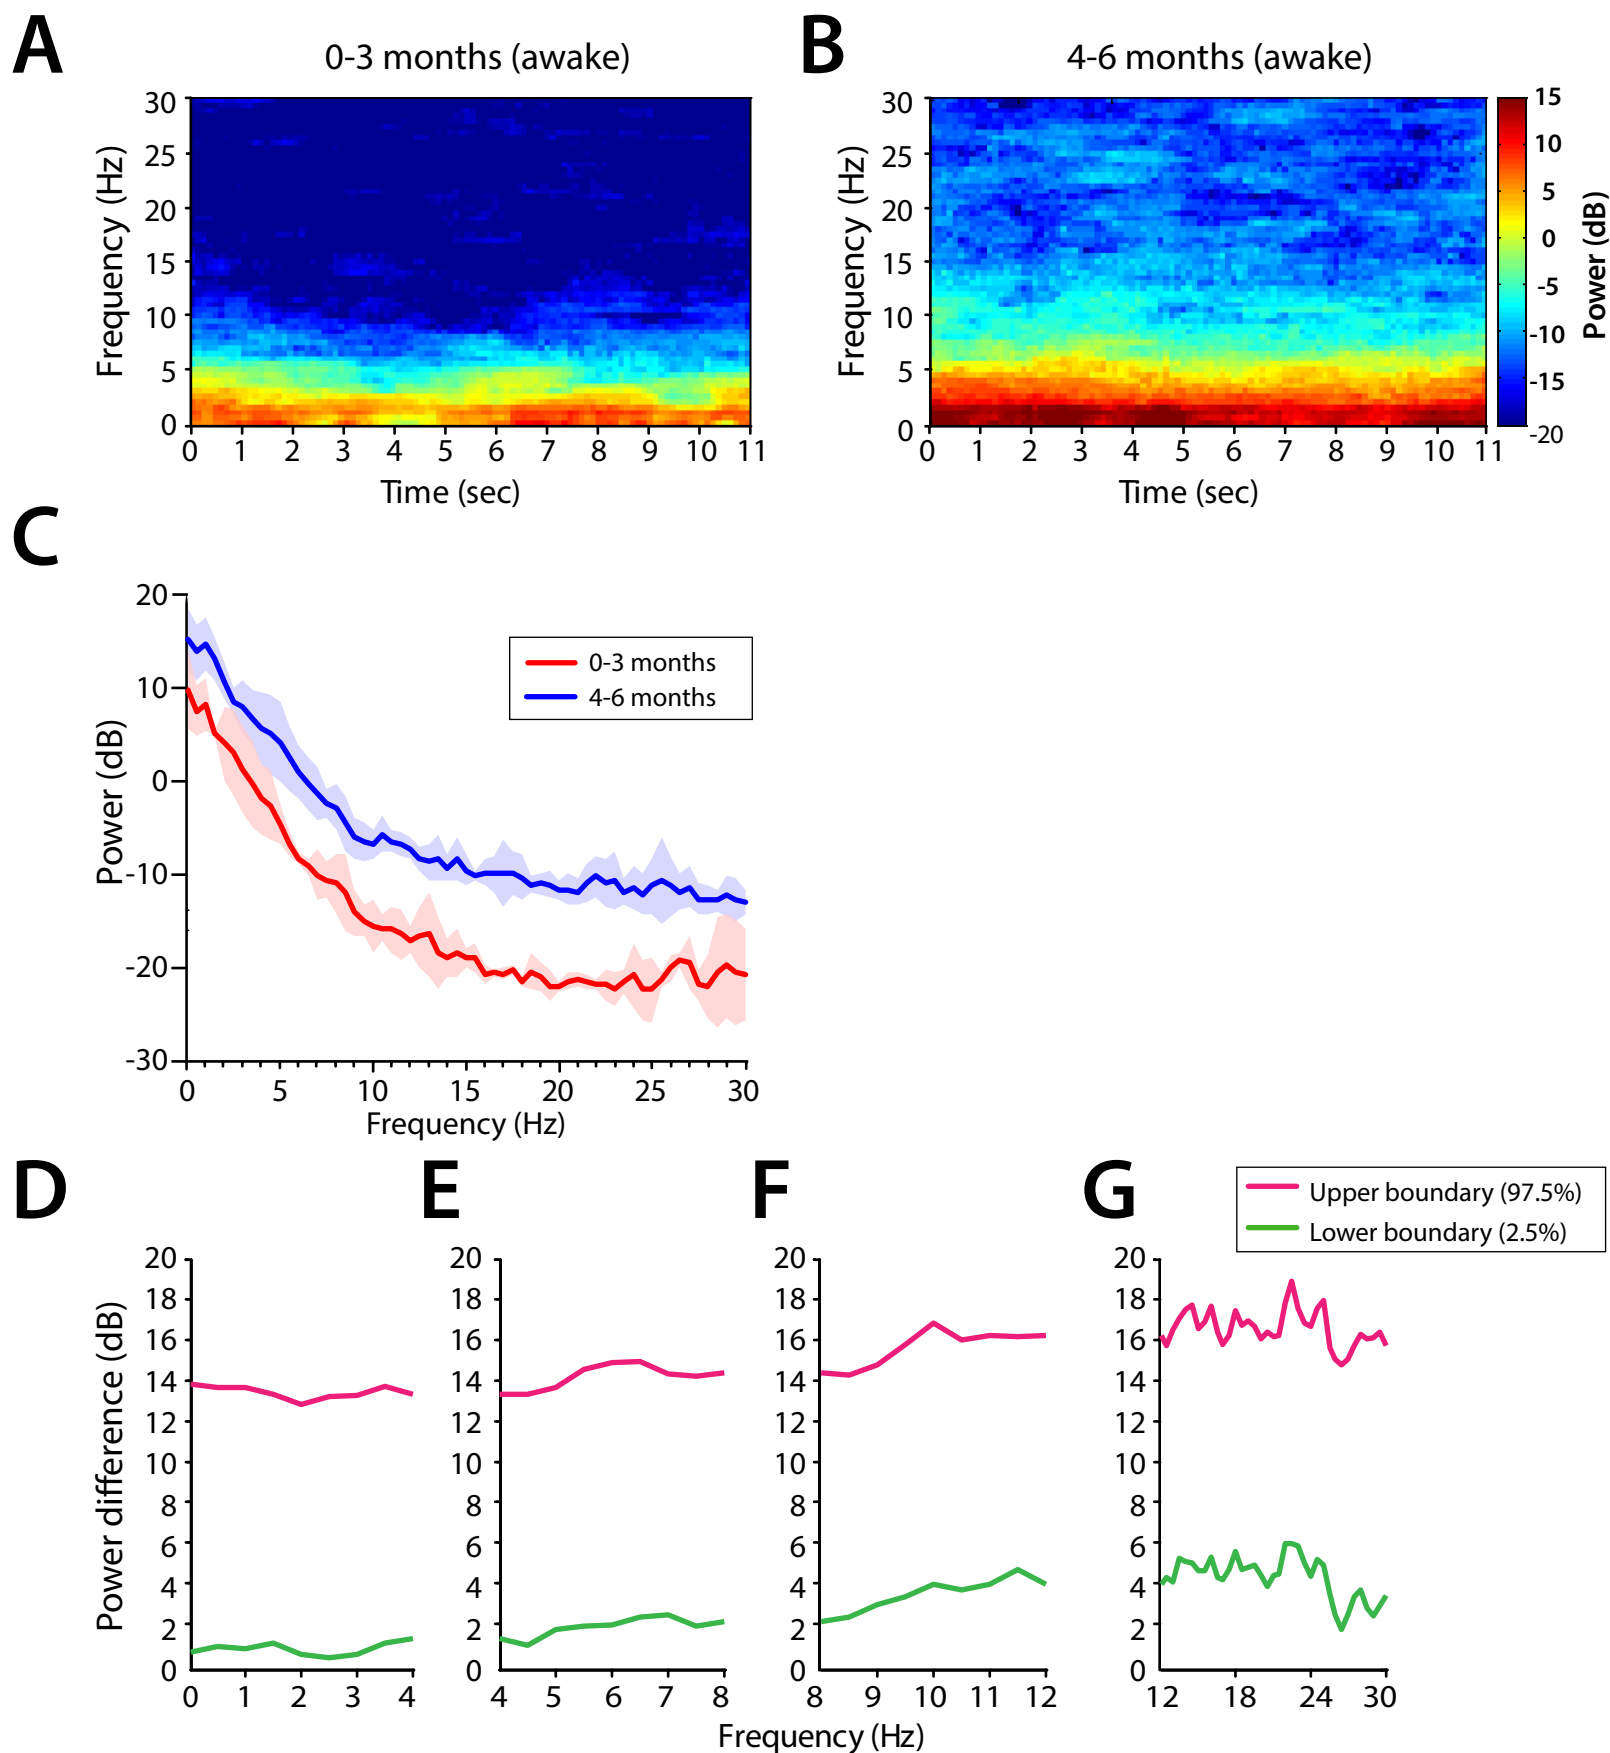

**Figure 10- Figure Supplement 1: Frontal EEG spectral properties in awake infants**

Frontal group-median spectrograms in infants (**A**) 0 to 3 months, and (**B**) 4 to 6 months of age. (**C**) Frontal group-median power spectra (solid line, median; shaded area, 25th - 75th percentile) across 0-30 Hz frequencies. (**D-G**) Differences in frontal group-median power spectra presented with 95% CI from bootstrap analysis (pink line, 97.5th percentile; green line, 2.5th percentile) comparing infants aged 0 to 3 months to infants 4 to 6 months of age. F7 electrode presented using nearest neighbor Laplacian referencing. Epoch size of 11 seconds is used.
